# Supplementary material
Source: HighWire-hosted journal article supplement (http://d2538ggaoe6cji.cloudfront.net/highwire/filestream/46328/field_highwire_adjunct_files/1/154369-2.pdf)
Supplement: 154369-2.pdf [file 154369-2.pdf]

Figure 2-figure supplement 2

GREAT Analysis: shared enhancers

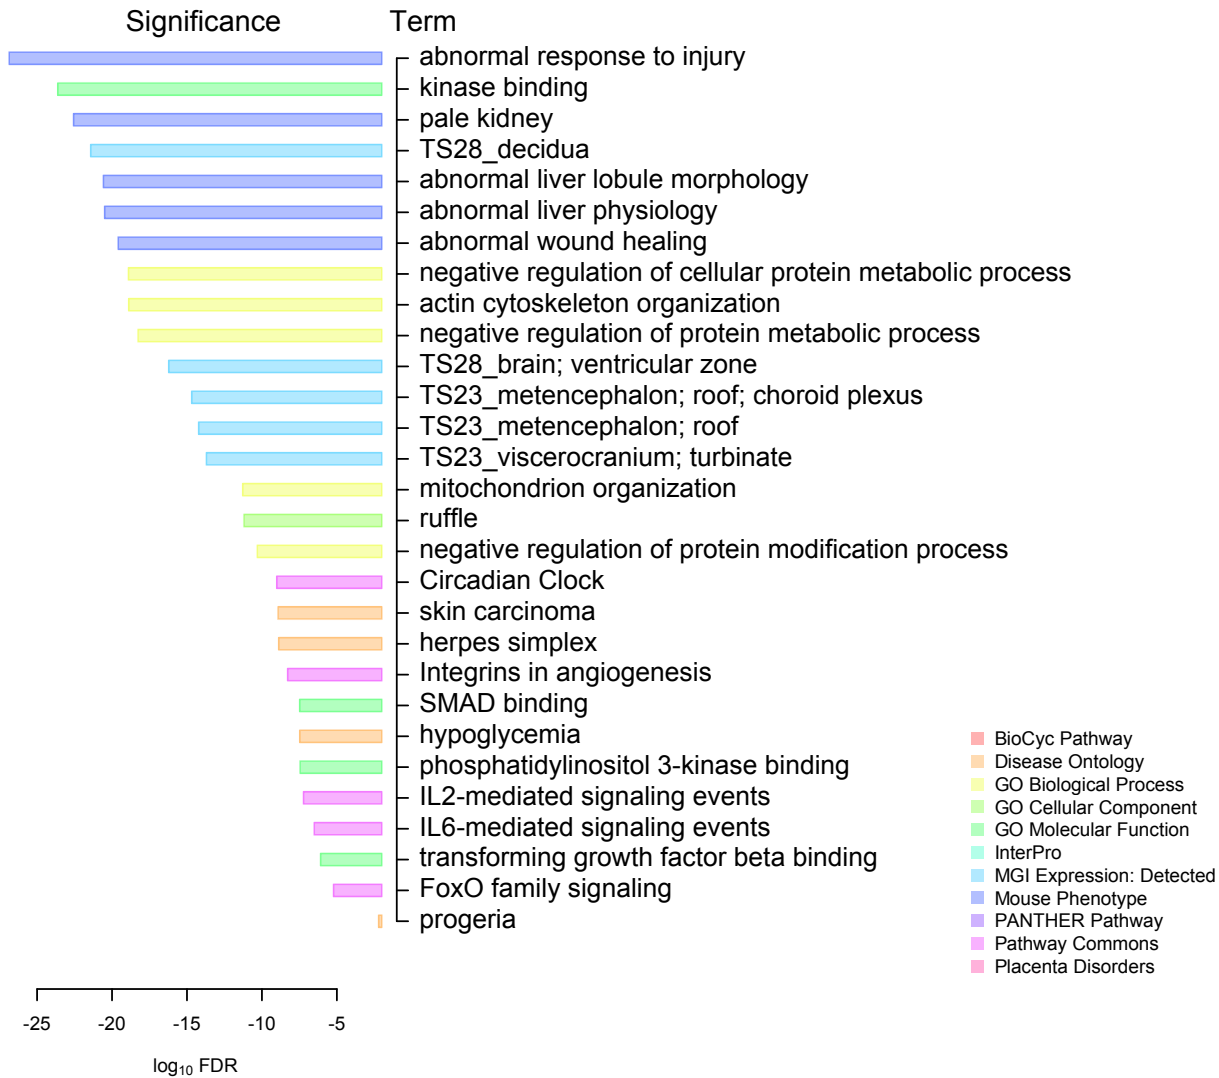

Figure 2-figure supplement 2.

Functional annotation of genes near putative enhancers present in both control cobblestone RPE and RPE exposed to TGFβ and TNFα.

The top over-represented categories belonging to the different ontologies are shown in the lower right legend. GO = Gene ontology, MGI = Mouse Genome Informatics. The x axes values correspond to the log<sub>10</sub> of false discovery rate.
